# Supplementary material
Source: PubMed Central journal article supplement (PMC4362728)
Supplement: NIHMS643041-supplement-1.pdf [file NIHMS643041-supplement-1.pdf]

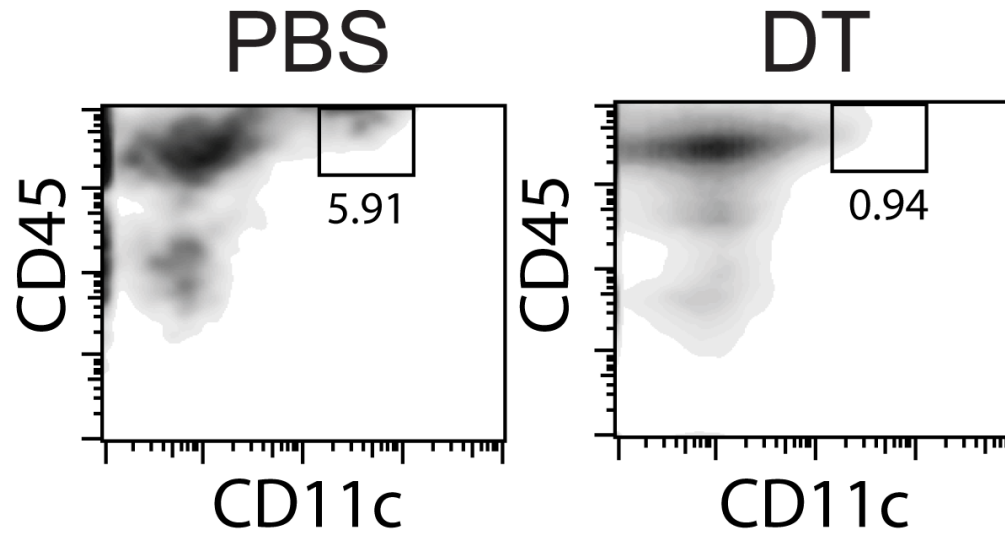

**Supplemental Figure 1.**

Following MOG<sub>35-55</sub> immunization CD11c-DTR mice were injected with DT (625ng / kg, i.p.) or PBS on day 14, 16, 18, and 20 of EAE. Two days following the last injection immune cells were isolated from CNS tissues, stained for CD45 and CD11c, and depletion efficiency was evaluated by flow cytometry. Numbers indicate percentage of cells in boxed gate.
